# Supplementary material for: A Novel Shape Memory Plate Osteosynthesis for Noninvasive Modulation of Fixation Stiffness in a Rabbit Tibia Osteotomy Model
Source: Hindawi journal article supplement (doi:10.1155/2015/652940), 2015-01-01
Supplement: f1 [file 652940.f1.pdf]

Müller CW et al.,

**A novel shape memory plate osteosynthesis for non-invasive modulation of fixation stiffness in a rabbit tibia osteotomy model**

**Supplementary material**

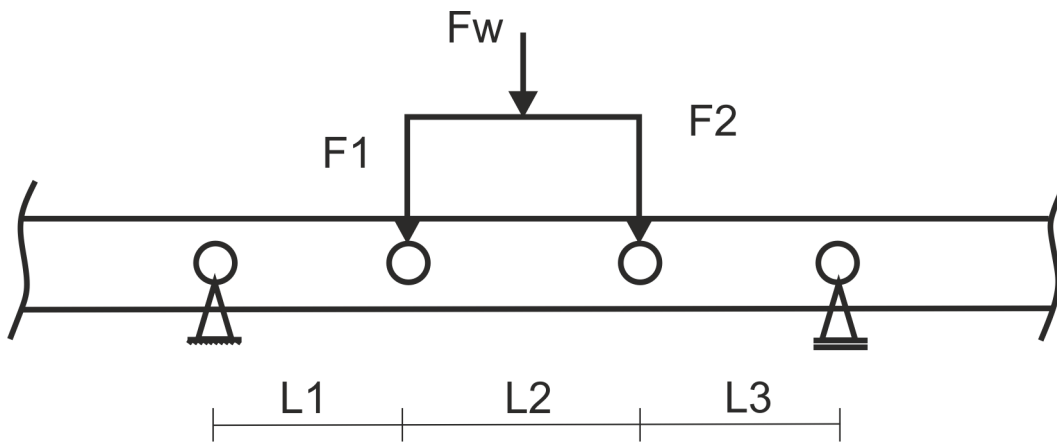

Supplementary figure 1: Schematic illustration of the in vivo four-point bending test. Showing weight ( $F_w$ ), distance between proximal pins ( $L_1$ ), distance between inner pins ( $L_2$ ), distance between distal pins ( $L_3$ ). Calculation of structural bending stiffness from in-vivo stiffness measurements

with  $\frac{\Delta F_w}{\Delta w} = m$  (*Slope of the Force – Distance – Graph*) and  $L_{total} = L_1 + L_2 + L_3$

$$EI = m * \frac{L_{total}^3}{6} * \left[ \left( \frac{L_1}{L_{total}} \right)^2 * \left( \frac{L_2 + L_3}{L_{total}} \right)^2 + \left( \frac{L_1 + L_2}{L_{total}} \right)^2 * \left( \frac{L_3}{L_{total}} \right)^2 \right]$$

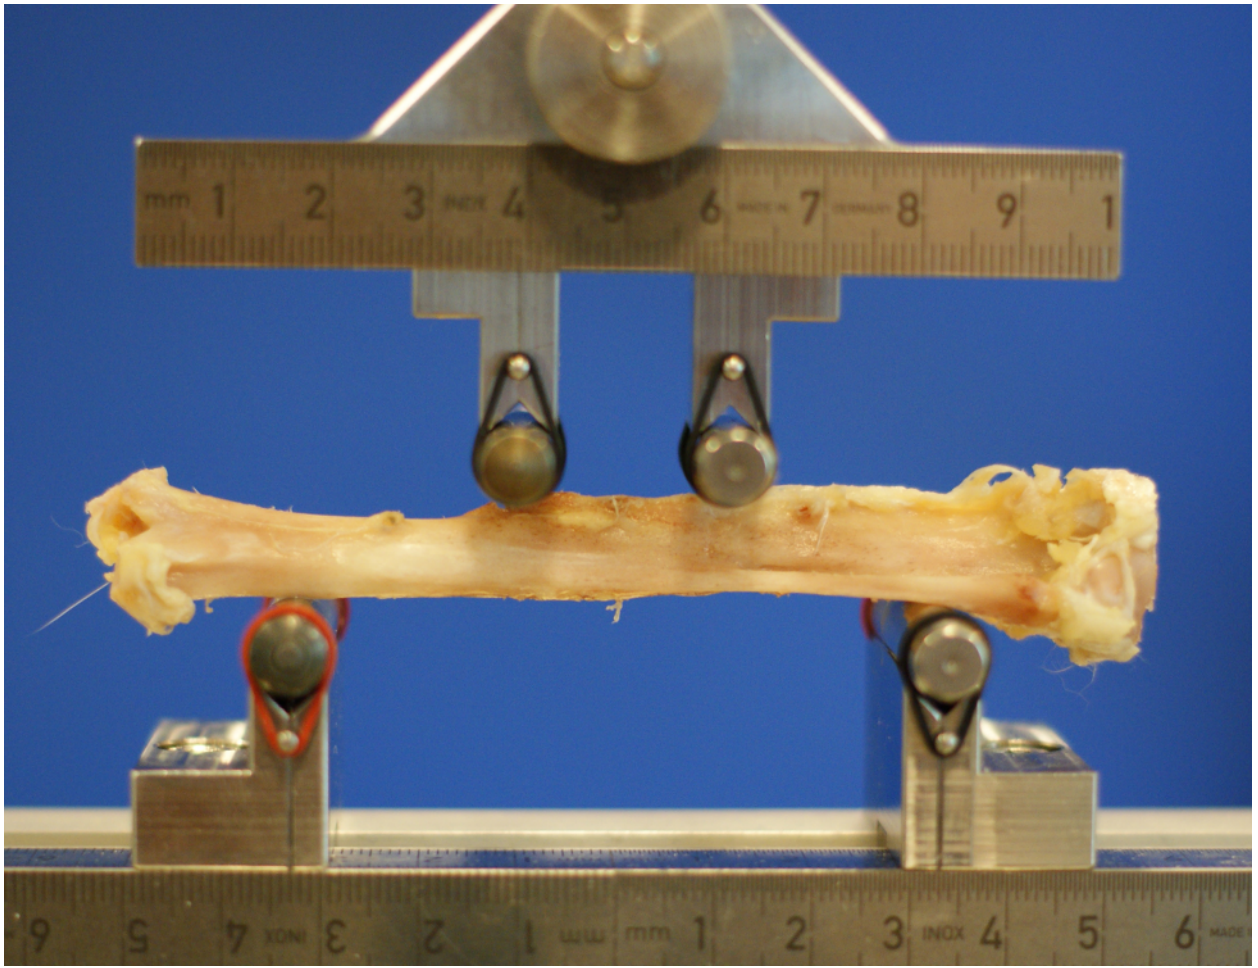

Supplementary figure 2: Setup ex-vivo four-point bending-test

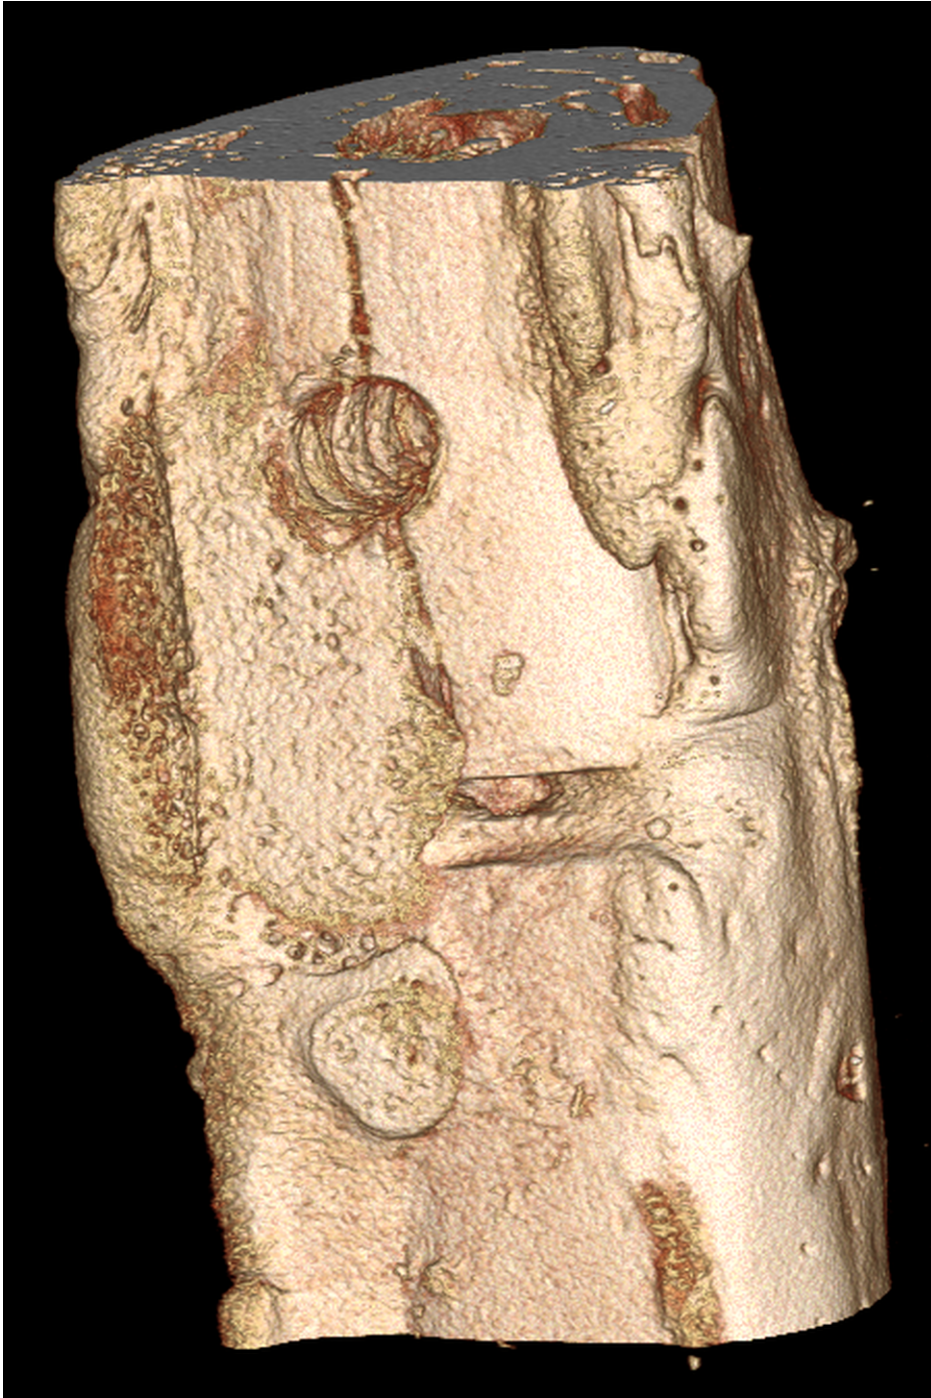

Supplementary figure 3:  $\mu$ CT 3D reconstruction of the osteotomy region of the tibia below the explanted plate (animal 30, induction group) shows bony bridging of the osteotomy 42 days after surgery.
